# Supplementary material for: Comparing the Feeding Damage of the Invasive Brown Marmorated Stink Bug to a Native Stink Bug and Leaffooted Bug on California Pistachios
Source: MDPI journal article supplement (doi:10.3390/insects11100688), 2020-10-12
Supplement: s1 [file s1]

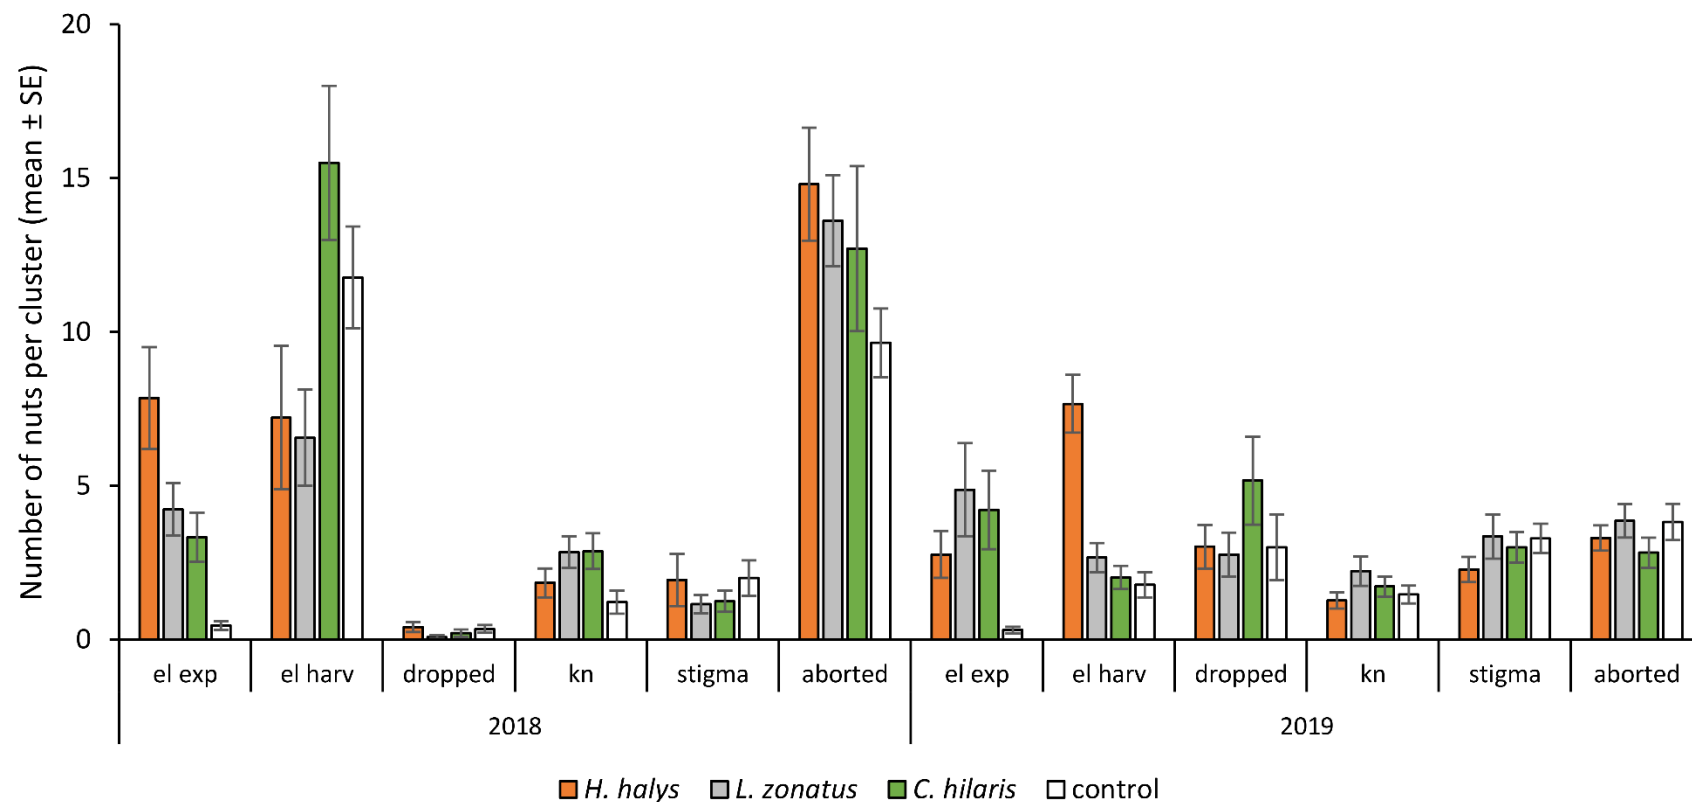

**Figure S1:** External and internal damage criteria recorded for the different insect treatments separated by year: 'el exp' = epicarp lesions recorded immediately after insect exposure, 'el harv' = epicarp lesions recorded during harvest, 'dropped' = dropped nuts, 'kn' = kernel necrosis, 'stigma' = fungal symptoms indicating stigmatomycosis, 'aborted' = aborted nuts. Differences between years in 'dropped' and 'aborted' nuts are likely due to a change in damage evaluation. Differences between years in 'el harv' nuts are likely due to temporal differences in data recording with recording in the laboratory after a period in storage of up to four weeks in 2018 and recording in the field in 2019.
